# Supplementary material for: International Trade Leads to Global Convergence in Consumption-based Steel Recycling Performance
Source: Research Square preprint supplement (doi:10.21203/rs.3.rs-6259858/v1), 2025-03-31
Supplement: Supplementary file 1 [file 4490d85bad434163ad9f7a10.pdf]

## Supplementary Information

**Table S1. The consumption-based and production-based steel recycling performance versus GDP per capita in 25 countries.**

| Country        | GDP per capita, PPP (current international \$) | Consumption-based recycled content | Recycling input rate |
|----------------|------------------------------------------------|------------------------------------|----------------------|
| India          | 6183                                           | 10%                                | 8%                   |
| Indonesia      | 10936                                          | 29%                                | 37%                  |
| China          | 14244                                          | 22%                                | 22%                  |
| Brazil         | 14525                                          | 29%                                | 25%                  |
| Mexico         | 19721                                          | 46%                                | 51%                  |
| Russia         | 25926                                          | 31%                                | 31%                  |
| Greece         | 28605                                          | 49%                                | 99%                  |
| Slovakia       | 30062                                          | 33%                                | 20%                  |
| Poland         | 30065                                          | 40%                                | 51%                  |
| Czech Republic | 38825                                          | 24%                                | 22%                  |
| Spain          | 39529                                          | 46%                                | 66%                  |
| South Korea    | 40957                                          | 44%                                | 36%                  |
| Japan          | 41505                                          | 42%                                | 31%                  |
| Italy          | 41581                                          | 54%                                | 70%                  |
| France         | 44577                                          | 36%                                | 32%                  |
| United Kingdom | 46372                                          | 27%                                | 23%                  |
| Finland        | 47570                                          | 50%                                | 37%                  |
| Canada         | 48317                                          | 45%                                | 45%                  |
| Australia      | 48399                                          | 32%                                | 32%                  |
| Belgium        | 50442                                          | 48%                                | 39%                  |
| Sweden         | 51948                                          | 35%                                | 34%                  |
| Germany        | 53071                                          | 37%                                | 36%                  |
| Austria        | 54173                                          | 28%                                | 20%                  |
| Netherlands    | 55089                                          | 27%                                | 13%                  |
| United States  | 60110                                          | 50%                                | 65%                  |

7 **Table S2. The impact of international trade on steel recycling performance for 25 countries.**

| Country        | Consumption-based recycled content | Recycling input rate | Impact of international trade |
|----------------|------------------------------------|----------------------|-------------------------------|
| Greece         | 49%                                | 99%                  | -50%                          |
| Spain          | 46%                                | 66%                  | -20%                          |
| Italy          | 54%                                | 70%                  | -16%                          |
| United States  | 50%                                | 65%                  | -14%                          |
| Poland         | 40%                                | 51%                  | -11%                          |
| Indonesia      | 29%                                | 37%                  | -8%                           |
| Mexico         | 46%                                | 51%                  | -5%                           |
| Australia      | 32%                                | 32%                  | 0%                            |
| Russia         | 31%                                | 31%                  | 0%                            |
| Canada         | 45%                                | 45%                  | 0%                            |
| China          | 22%                                | 22%                  | 0%                            |
| Sweden         | 35%                                | 34%                  | 0%                            |
| Germany        | 37%                                | 36%                  | 1%                            |
| Czech Republic | 24%                                | 22%                  | 2%                            |
| India          | 10%                                | 8%                   | 2%                            |
| France         | 36%                                | 32%                  | 3%                            |
| Brazil         | 29%                                | 25%                  | 4%                            |
| United Kingdom | 27%                                | 23%                  | 5%                            |
| Austria        | 28%                                | 20%                  | 7%                            |
| South Korea    | 44%                                | 36%                  | 8%                            |
| Belgium        | 48%                                | 39%                  | 9%                            |
| Japan          | 42%                                | 31%                  | 11%                           |
| Finland        | 50%                                | 37%                  | 12%                           |
| Slovakia       | 33%                                | 20%                  | 13%                           |
| Netherlands    | 27%                                | 13%                  | 14%                           |

8

9

10

11

12

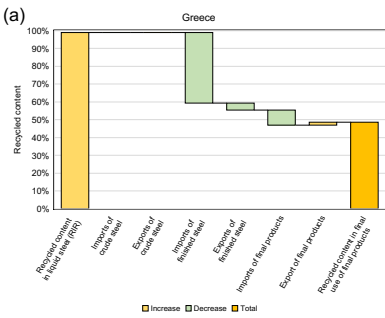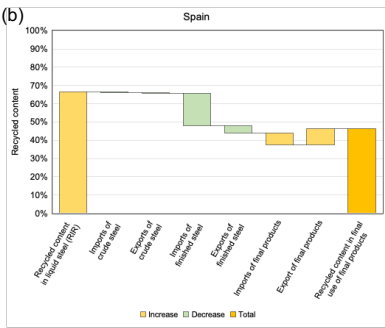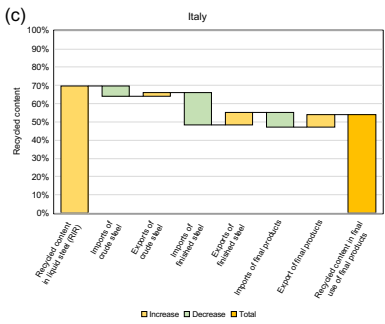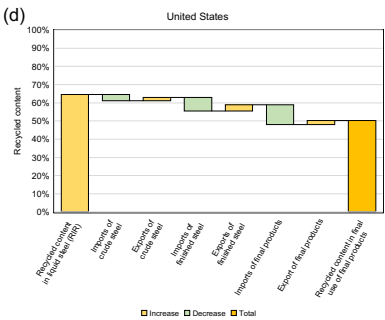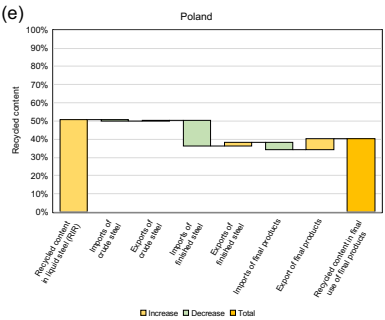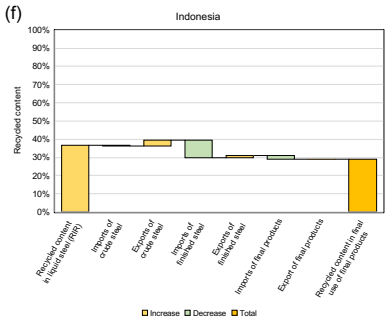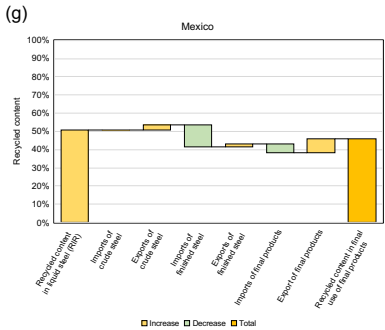

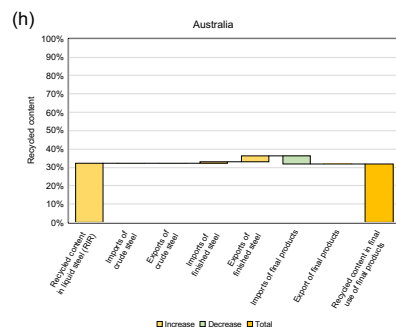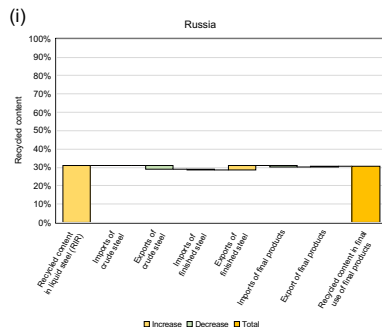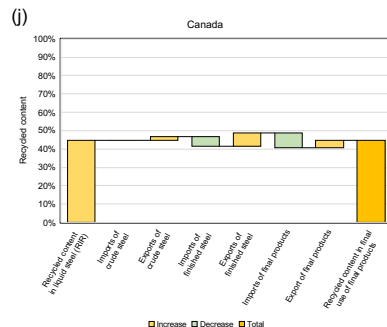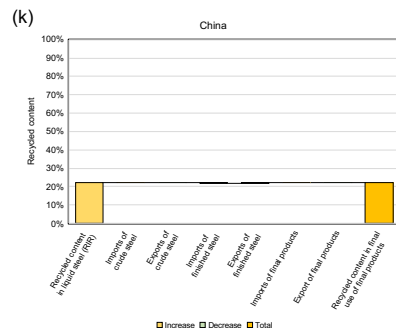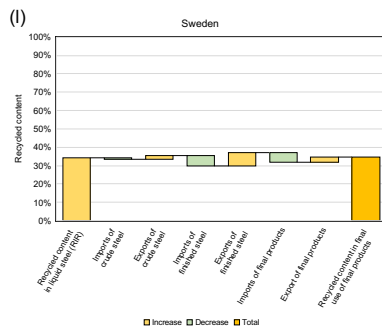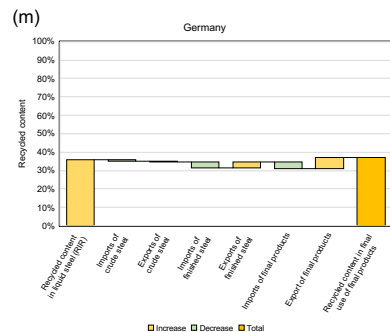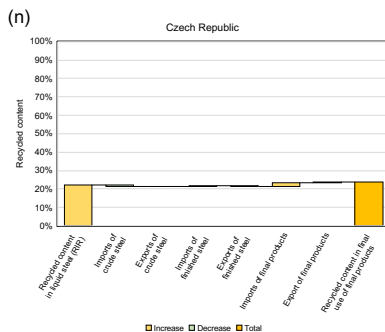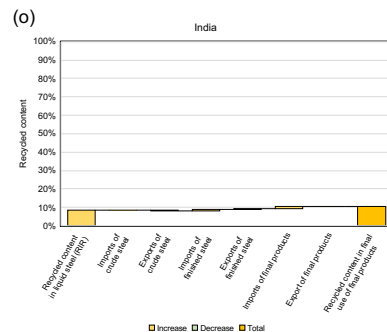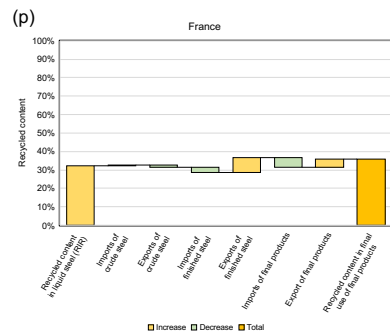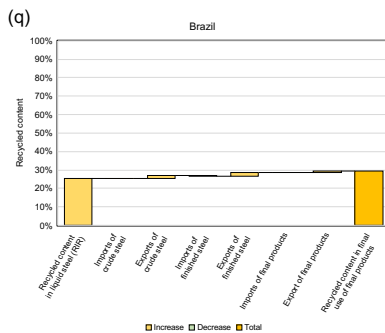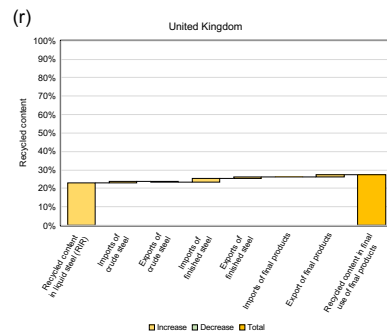

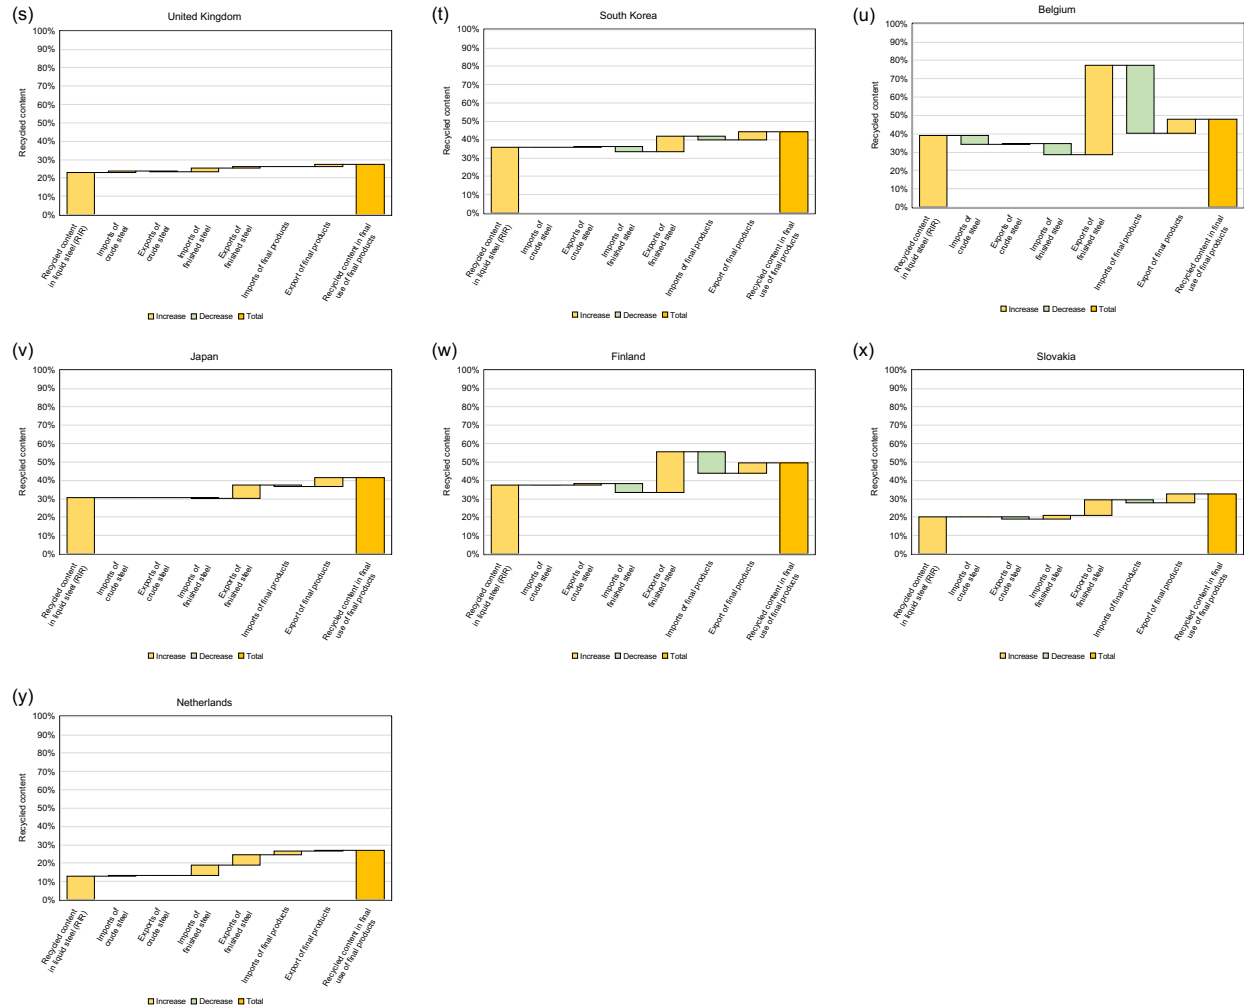

**Fig. S1. The impacts of international trades on recycled contents for 25 countries.**

**Table S3. The CB-RCs and impacts of factors on promotion of CB-RC for 25 countries**

| Country | Consumption-based recycled content (CB-RC) under baseline scenario | CB-RC under hypothetical scenario 1 | CB-RC under hypothetical scenario 2 | CB-RC under hypothetical scenario 3 | Impact of scrap unavailability and contaminations, $\Delta$ CB-RC1 | Impact of portfolio of steelmaking facilities, $\Delta$ CB-RC2 | Impact of demand for high-quality steel products, $\Delta$ CB-RC3 | Impact of international trade, $\Delta$ CB-RC4 |
|---------|--------------------------------------------------------------------|-------------------------------------|-------------------------------------|-------------------------------------|--------------------------------------------------------------------|----------------------------------------------------------------|-------------------------------------------------------------------|------------------------------------------------|
| India   | 10%                                                                | 58%                                 | 58%                                 | 93%                                 | 48%                                                                | 0%                                                             | 34%                                                               | 7%                                             |

|                |     |     |     |     |     |     |     |     |
|----------------|-----|-----|-----|-----|-----|-----|-----|-----|
| China          | 22% | 37% | 63% | 98% | 14% | 26% | 35% | 2%  |
| Brazil         | 29% | 47% | 62% | 90% | 18% | 15% | 28% | 10% |
| Russia         | 31% | 46% | 46% | 83% | 16% | 0%  | 36% | 17% |
| Slovakia       | 33% | 40% | 40% | 74% | 8%  | 0%  | 34% | 26% |
| Japan          | 42% | 55% | 63% | 95% | 13% | 9%  | 32% | 5%  |
| South Korea    | 44% | 58% | 58% | 83% | 13% | 0%  | 25% | 17% |
| Czech Republic | 24% | 28% | 50% | 53% | 4%  | 22% | 2%  | 47% |
| Netherlands    | 27% | 32% | 36% | 50% | 5%  | 5%  | 14% | 50% |
| United Kingdom | 27% | 34% | 38% | 49% | 6%  | 5%  | 11% | 51% |
| Austria        | 28% | 35% | 43% | 63% | 7%  | 8%  | 20% | 37% |
| Indonesia      | 29% | 34% | 34% | 41% | 5%  | 0%  | 6%  | 59% |
| Australia      | 32% | 36% | 40% | 54% | 5%  | 3%  | 14% | 46% |
| Sweden         | 35% | 41% | 41% | 51% | 7%  | 0%  | 9%  | 49% |
| France         | 36% | 43% | 43% | 55% | 7%  | 0%  | 12% | 45% |
| Germany        | 37% | 46% | 47% | 71% | 9%  | 1%  | 23% | 29% |
| Poland         | 40% | 45% | 52% | 61% | 5%  | 7%  | 9%  | 39% |
| Canada         | 45% | 53% | 53% | 62% | 8%  | 0%  | 9%  | 38% |
| Mexico         | 46% | 70% | 70% | 75% | 24% | 0%  | 6%  | 25% |
| Spain          | 46% | 51% | 51% | 62% | 5%  | 0%  | 10% | 38% |
| Belgium        | 48% | 50% | 50% | 52% | 2%  | 0%  | 2%  | 48% |
| Greece         | 49% | 49% | 49% | 49% | 0%  | 0%  | 0%  | 51% |
| Finland        | 50% | 55% | 55% | 56% | 5%  | 0%  | 2%  | 44% |
| United States  | 50% | 58% | 58% | 69% | 8%  | 0%  | 11% | 31% |
| Italy          | 54% | 65% | 65% | 67% | 11% | 0%  | 2%  | 33% |

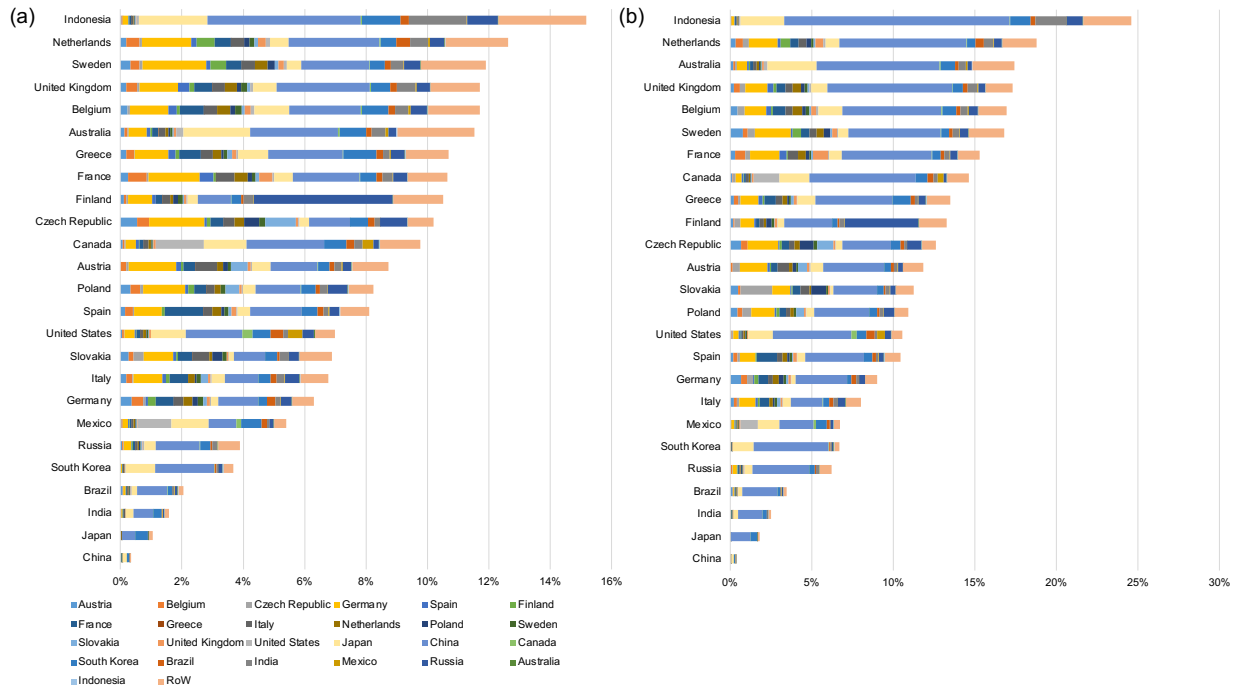

**Fig. S2. The potential promotions of steel recycling performance caused by national steel recycling promotion strategies in upstream countries. (a) Effects of maximizing scrap input by steelmaking furnace type in upstream countries. (b) Effects of maximizing the capacity of EAFs to produce all long steel products alongside maximum scrap input in upstream countries.**

**Table S4. Descriptions for 47 states.**

| Layer code | Layer                | State code | State                       | Description in MRMF table of iron and steel |
|------------|----------------------|------------|-----------------------------|---------------------------------------------|
| 1          | Natural resource (N) | 1          | Iron ore                    | Form of iron and steel                      |
| 2          | Raw material (M)     | 2          | Pig iron                    | Form of iron and steel                      |
| 2          | Raw material (M)     | 3          | Direct reduction iron (DRI) | Form of iron and steel                      |
| 2          | Raw material (M)     | 4          | Steel scrap                 | Form of iron and steel                      |
| 3          | Liquid steel (D)     | 5          | BOF liquid steel            | Form of iron and steel                      |
| 3          | Liquid steel (D)     | 6          | OHF liquid steel            | Form of iron and steel                      |
| 3          | Liquid steel (D)     | 7          | EAF liquid steel            | Form of iron and steel                      |

|   |                         |    |                                                           |                        |
|---|-------------------------|----|-----------------------------------------------------------|------------------------|
| 4 | Crude steel (C)         | 8  | Slabs                                                     | Form of iron and steel |
| 4 | Crude steel (C)         | 9  | Billets                                                   | Form of iron and steel |
| 4 | Crude steel (C)         | 10 | Blooms                                                    | Form of iron and steel |
| 4 | Crude steel (C)         | 11 | Ingots                                                    | Form of iron and steel |
| 5 | Finished steel (F)      | 12 | Hot rolled coil-sheet-strip                               | Form of iron and steel |
| 5 | Finished steel (F)      | 13 | Welded tubes                                              | Form of iron and steel |
| 5 | Finished steel (F)      | 14 | Electrical sheet and strip                                | Form of iron and steel |
| 5 | Finished steel (F)      | 15 | Tinmill products                                          | Form of iron and steel |
| 5 | Finished steel (F)      | 16 | Other metal coated sheet and strip                        | Form of iron and steel |
| 5 | Finished steel (F)      | 17 | Other non-metal coated sheet and strip                    | Form of iron and steel |
| 5 | Finished steel (F)      | 18 | Hot rolled plate                                          | Form of iron and steel |
| 5 | Finished steel (F)      | 19 | Seamless tubes                                            | Form of iron and steel |
| 5 | Finished steel (F)      | 20 | Heavy sections                                            | Form of iron and steel |
| 5 | Finished steel (F)      | 21 | Railway track material                                    | Form of iron and steel |
| 5 | Finished steel (F)      | 22 | Light sections                                            | Form of iron and steel |
| 5 | Finished steel (F)      | 23 | Concrete reinforcing bars                                 | Form of iron and steel |
| 5 | Finished steel (F)      | 24 | Hot rolled bars other than concrete reinforcing bars      | Form of iron and steel |
| 5 | Finished steel (F)      | 25 | Wire rod                                                  | Form of iron and steel |
| 5 | Finished steel (F)      | 26 | Forgings                                                  | Form of iron and steel |
| 5 | Finished steel (F)      | 27 | Castings                                                  | Form of iron and steel |
| 6 | Final steel product (P) | 28 | Fabricated metal products, except machinery and equipment | Form of iron and steel |



|   |                                |    |                                                                             |                         |
|---|--------------------------------|----|-----------------------------------------------------------------------------|-------------------------|
| 6 | Final steel product (P)        | 29 | Machinery and equipment                                                     | Form of iron and steel  |
| 6 | Final steel product (P)        | 30 | Office machinery and computers                                              | Form of iron and steel  |
| 6 | Final steel product (P)        | 31 | Electrical machinery and apparatus                                          | Form of iron and steel  |
| 6 | Final steel product (P)        | 32 | Radio, television and communication equipment and apparatus                 | Form of iron and steel  |
| 6 | Final steel product (P)        | 33 | Medical, precision and optical instruments, watches and clocks              | Form of iron and steel  |
| 6 | Final steel product (P)        | 34 | Motor vehicles, trailers and semi-trailers                                  | Form of iron and steel  |
| 6 | Final steel product (P)        | 35 | Other transport equipment                                                   | Form of iron and steel  |
| 6 | Final steel product (P)        | 36 | Furniture; other manufactured goods                                         | Form of iron and steel  |
| 6 | Final steel product (P)        | 37 | Construction work                                                           | Form of iron and steel  |
| 7 | Final use of final product (U) | 38 | Final use of fabricated metal products, except machinery and equipment      | Item of boundary output |
| 7 | Final use of final product (U) | 39 | Final use of machinery and equipment                                        | Item of boundary output |
| 7 | Final use of final product (U) | 40 | Final use of office machinery and computers                                 | Item of boundary output |
| 7 | Final use of final product (U) | 41 | Final use of electrical machinery and apparatus                             | Item of boundary output |
| 7 | Final use of final product (U) | 42 | Final use of radio, television and communication equipment and apparatus    | Item of boundary output |
| 7 | Final use of final product (U) | 43 | Final use of medical, precision and optical instruments, watches and clocks | Item of boundary output |
| 7 | Final use of final product (U) | 44 | Final use of motor vehicles, trailers and semi-trailers                     | Item of boundary output |

|   |                                |    |                                                  |                         |
|---|--------------------------------|----|--------------------------------------------------|-------------------------|
| 7 | Final use of final product (U) | 45 | Final use of other transport equipment           | Item of boundary output |
| 7 | Final use of final product (U) | 46 | Final use of furniture; other manufactured goods | Item of boundary output |
| 7 | Final use of final product (U) | 47 | Final use of construction work                   | Item of boundary output |

29

30 **Table S5. The name and code for each economy.**

| Code | Economy        |
|------|----------------|
| 1    | Austria        |
| 2    | Belgium        |
| 3    | Czech Republic |
| 4    | Germany        |
| 5    | Spain          |
| 6    | Finland        |
| 7    | France         |
| 8    | Greece         |
| 9    | Italy          |
| 10   | Netherlands    |
| 11   | Poland         |
| 12   | Sweden         |
| 13   | Slovakia       |
| 14   | United Kingdom |
| 15   | United States  |
| 16   | Japan          |
| 17   | China          |
| 18   | Canada         |
| 19   | South Korea    |
| 20   | Brazil         |
| 21   | India          |
| 22   | Mexico         |
| 23   | Russia         |
| 24   | Australia      |
| 25   | Indonesia      |
| 26   | Taiwan, China  |
| 27   | Rest of world  |

31

32
